# Supplementary material for: Genome-wide association analysis of nutrient traits in the oyster Crassostrea gigas: genetic effect and interaction network
Source: BMC Genomics. 2019 Jul 31;20:625. doi: 10.1186/s12864-019-5971-z (PMC6670154; doi:10.1186/s12864-019-5971-z)
Supplement: Supplementary file 1 — Table S1 Sample information of Pacific oysters used in this study. (XLSX 10 kb) [file 12864_2019_5971_MOESM1_ESM.xlsx]

## Sheet: Sheet1
Table S1. Sample information of Pacific oysters used in this study.
Location	Longitude	Latitude	Sea area
Dandong	123.71	39.75	intertidal zone
Zhuanghe	122.96	39.62	intertidal zone
Haiyangdao	123.2	39.06	intertidal zone
Dalian	121.56	38.87	intertidal zone
Bayuquan	121.99	40.18	intertidal zone
Jinzhou	121.07	40.83	intertidal zone
Qinhuangdao	119.62	39.91	intertidal zone
Changli	119.33	39.7	intertidal zone
Laoting	118.87	39.16	intertidal zone
Binzhou	118.05	38.18	intertidal zone
Weifang	119.52	37.12	intertidal zone
Yantai	121.61	37.47	intertidal zone
Weihai	122.18	37.5	intertidal zone
Rongcheng	122.48	37.14	intertidal zone
Qingdao	119.95	35.72	intertidal zone
Aoshanwei	120.71	36.36	intertidal zone
Rizhao	119.58	35.44	intertidal zone
Lianyungang	119.28	34.87	intertidal zone
Japan	139.69	35.7	intertidal zone
Korea	126°58'	37°33'	intertidal zone
Canada	123°06’	49°13’	intertidal zone
1. DanDong; 2. ZhuangHe; 3. Haiyang Dao; 4. DaLian; 5. Bayu Quan; 6. JinZhou; 7. QinHuangdao; 8. ChangLi; 9. LaoTing; 10. BinZhou; 11. WeiFang; 12. YanTai; 13. WeiHai; 14. RongCheng; 15. Qingdao_ShenTanggou; 16. QingDao_JiaoNan; 17. RiZhao; 18. LianYungang.
