# Supplementary material for: Genome-wide association analysis of nutrient traits in the oyster Crassostrea gigas: genetic effect and interaction network
Source: BMC Genomics. 2019 Jul 31;20:625. doi: 10.1186/s12864-019-5971-z (PMC6670154; doi:10.1186/s12864-019-5971-z)
Supplement: Supplementary file 2 — Table S2 Summary of the results of whole-genome resequencing. (XLSX 11 kb) [file 12864_2019_5971_MOESM2_ESM.xlsx]

## Sheet: TableS1
TableS2. Summary of the results of whole-genome resequencing.
Name	Canada	Japan	Korean	Total of China
Numbers of individuals	15	15	12	384
UniqDepth	14.2	19.9	23.1	21.1
UniqCov(%)	77.3	78.3	79.1	78.825
SNP per individual	8890943	9311620	9442503	9.37522e+06
SNP in Gene Region per individual	3376255	3510964	3550767	9.37522e+06
SNP in CDS Region per individual	663512	689279	692274	533315
SNP number	22484806	22754368	19453330	4.09773e+07
Gene Region	9622822	9664096	8338041	16870428
Coding Region	1503240	1506894	1304314	2619145
Fixed Number	386448	435288	630534	8349600
Gene Region	195875	220912	311847	5486516
Coding Region	34630	38602	51988	7968542
Specific SNP	48134	49529	34488	496919
Gene Region	26838	27068	18926	279492
Coding Region	9228	8072	5266	92835
INDEL number	5891801	5952922	5089740	11136490
Gene Region	2501974	2509145	2161086	4357428
Coding Region	79286	80486	68617	145480
Fixed INDEL	110462	123974	186643	489634
Gene Region	53851	60407	89568	14745
Coding Region	1489	1710	2401	549
Specific INDEL	10504	11846	8375	36783
Gene Region	5169	5862	4165	56230
Coding Region	308	321	230	3256
Nucleotide diveristy theta	0.009915	0.010034	0.0091	0.0127
