# Supplementary material for: Genome-wide association analysis of nutrient traits in the oyster Crassostrea gigas: genetic effect and interaction network
Source: BMC Genomics. 2019 Jul 31;20:625. doi: 10.1186/s12864-019-5971-z (PMC6670154; doi:10.1186/s12864-019-5971-z)
Supplement: Supplementary file 4 — Table S4 Fold changes of different nutrient quality traits in 426 individuals. (XLSX 12 kb) [file 12864_2019_5971_MOESM4_ESM.xlsx]

## Sheet: TableS3
Table S4. Fold changes of different nutrient quality traits in 426 individuals.
Trait	Min	Max	Range of variety	Average	Fold change	Standard Deviation	Coefficient of Variation
Glycogen	44.024	239.044	44.02-239.04	111.948	5.42986	29.9667	0.267684
Protein	44.576	62.1847	44.58-62.18	54.17	1.39503	3.06	0.0565
Glu	4.61	6.75	4.61-6.75	5.81122	1.46421	0.306945	0.0528193
Tau	3.639	5.689	3.639-5.689	4.61078	1.56334	0.355623	0.0771285
Asp	3.25	4.74	3.25-4.74	4.01817	1.45846	0.231721	0.0576683
Lys	2.33	3.82	2.33-3.82	3.14923	1.63948	0.259922	0.0825353
Leu	2.14	3.27	2.14-3.27	2.82297	1.52804	0.192231	0.0680953
Arg	2.11	3.46	2.11-3.46	2.8003	1.63981	0.264502	0.0944546
Gly	2.03	3.65	2.03-3.65	2.65864	1.79803	0.253215	0.0952423
Ala	1.78	2.82	1.78-2.82	2.32684	1.58427	0.143408	0.061632
Val	1.61	2.42	1.61-2.42	2.03157	1.50311	0.13758	0.0677211
Pro	1.69	2.36	1.69-2.36	2.05485	1.39645	0.104348	0.0507812
Ile	1.44	2.15	1.44-2.15	1.83126	1.49306	0.13061	0.0713223
Ser	1.33	2.31	1.33-2.31	1.78516	1.73684	0.168639	0.094467
Thr	1.31	1.96	1.31-1.96	1.70362	1.49618	0.103126	0.0605334
Phe	1.24	2.04	1.24-2.04	1.60593	1.64516	0.143025	0.0890608
His	1.01	1.86	1.01-1.86	1.42843	1.84158	0.118443	0.0829183
Tyr	0.48	1.53	0.48-1.53	1.05396	3.1875	0.149132	0.141497
Cys	0.05	0.97	0.05-0.97	0.347775	19.4	0.172773	0.496796
Met	0.05	0.92	0.05-0.92	0.113841	18.4	0.110832	0.973573
