# Supplementary material for: Genome-wide association analysis of nutrient traits in the oyster Crassostrea gigas: genetic effect and interaction network
Source: BMC Genomics. 2019 Jul 31;20:625. doi: 10.1186/s12864-019-5971-z (PMC6670154; doi:10.1186/s12864-019-5971-z)
Supplement: Supplementary file 7 — Table S7 The significant SNP loci of glycogen contents with the genome-wide analysis for 288 individuals using the compressed MLM model. (XLSX 243 kb) [file 12864_2019_5971_MOESM7_ESM.xlsx]

## Sheet: Table S7 (1)
Table S7. The significant SNP loci of glycogen contents with the genome-wide analysis for 288 individuals using the compressed MLM model.
SNP	P.value
scaffold537_77074	6.79e-07
scaffold34_402114	9.84e-07
scaffold3_60550	3.15e-06
scaffold1895_3324	3.15e-06
scaffold1149_2991	3.15e-06
scaffold94_514021	4e-06
scaffold1313_7668	8.62e-06
scaffold3500_9974	1.33e-05
scaffold1034_58483	2.25e-05
scaffold584_145036	2.34e-05
scaffold1538_91720	3.17e-05
scaffold119_566738	3.4e-05
scaffold17_892621	4.06e-05
scaffold785_202692	6.06e-05
scaffold1573_21854	7.5e-05
scaffold253_358892	7.71e-05
scaffold57_447812	7.79e-05
scaffold676_139125	9.17e-05
scaffold990_57527	0.000108721
scaffold1581_77766	0.000116766
scaffold25_917600	0.000145996
scaffold115_508841	0.000149684
scaffold781_90102	0.00015146
scaffold15_1287000	0.00015288
scaffold32_569796	0.000153789
scaffold88_641865	0.000158072
scaffold15_617607	0.000160961
scaffold245_47892	0.000163495
scaffold12_420558	0.000168602
scaffold205_307327	0.000172038
scaffold1813_29378	0.000179796
scaffold189_390409	0.000184388
scaffold551_80901	0.000191556
scaffold2541_545	0.000196324
scaffold135_171134	0.00020732
scaffold1740_61060	0.000211723
scaffold35_706371	0.000211922
scaffold58_428727	0.00022595
scaffold29_689486	0.000226957
scaffold1017_5705	0.000230448
scaffold1033_107545	0.000236112
scaffold120_341704	0.000236153
scaffold54_773812	0.000241276
scaffold94_515233	0.000251413
scaffold1422_78716	0.000251448
scaffold957_96371	0.000253616
scaffold2178_17784	0.000254401
scaffold722_67953	0.000256682
scaffold130_244975	0.000257742
scaffold19_432955	0.000268912
scaffold45_235171	0.000272731
scaffold831_141799	0.000274007
scaffold12_300546	0.000300531
scaffold225_228670	0.000319961
scaffold31_708929	0.000321102
scaffold1049_52157	0.000322936
scaffold47_409321	0.000324937
scaffold1597_37438	0.000335986
scaffold504_218424	0.00033779
scaffold32_836699	0.000344852
scaffold2318_5657	0.000348769
scaffold369_31044	0.000356598
scaffold120_9990	0.000358037
scaffold246_414239	0.000360683
scaffold61_194119	0.000364572
scaffold25_673176	0.000369436
scaffold781_88580	0.000376639
scaffold781_115597	0.000377202
scaffold170_507025	0.000380178
scaffold137_121039	0.000385797
scaffold2728_24647	0.000386634
scaffold331_359946	0.000387958
scaffold334_68145	0.000389068
scaffold83_638368	0.000408855
scaffold1158_124709	0.000413376
scaffold563_25527	0.000413885
scaffold1653_60123	0.00042305
scaffold173_273159	0.000434994
scaffold412_80476	0.00043849
scaffold459_90403	0.000448223
scaffold294_93116	0.000458182
scaffold566_87186	0.000459196
scaffold2437_22520	0.0004634
scaffold562_39756	0.00046467
scaffold1931_8225	0.000466381
scaffold198_231241	0.000469237
scaffold66_562434	0.000472816
scaffold243_247249	0.000475244
scaffold165_362756	0.000476693
scaffold1194_122335	0.000478935
scaffold1580_38938	0.000487512
scaffold777_208239	0.00048936
scaffold164_353122	0.000496036
scaffold519_295742	0.000498039
scaffold39_301561	0.000499915
scaffold1430_893	0.000502623
scaffold921_18784	0.000506648
scaffold420_52319	0.000509915
scaffold854_52667	0.000517286
scaffold294_218228	0.000535274
scaffold79_491352	0.000538029
scaffold670_127564	0.000541267
scaffold356_282063	0.000553746
scaffold974_2853	0.000577776
scaffold47_11417	0.000579496
scaffold31_271097	0.00058093
scaffold444_263380	0.000586435
scaffold639_178390	0.000593654
scaffold940_39213	0.000593673
scaffold127_42270	0.000594533
scaffold1795_59057	0.000597306
scaffold1563_40913	0.000611227
scaffold513_51445	0.000613094
scaffold967_61640	0.000616253
scaffold70_20232	0.000621992
scaffold856_116797	0.000633468
scaffold34_255795	0.000635701
scaffold793_155605	0.000664189
scaffold551_80853	0.000670659
scaffold512_269631	0.000676653
scaffold97_143357	0.000689283
scaffold443_200254	0.000691447
scaffold4957_3411	0.000706587
scaffold307_341586	0.000719342
scaffold416_34131	0.000721995
scaffold634_103545	0.000732959
scaffold49_196519	0.000736353
scaffold57_188190	0.000742017
scaffold450_206229	0.000772934
scaffold108_257822	0.000775145
scaffold477_229140	0.00077602
scaffold14_105354	0.000777757
scaffold289_108862	0.000779177
scaffold327_270074	0.000790463
scaffold1760_78820	0.000790782
scaffold238_360568	0.000791363
scaffold432_88579	0.000795546
scaffold287_329768	0.000802428
scaffold124_16916	0.000807727
scaffold274_197188	0.000811626
scaffold710_195894	0.000820934
scaffold223_205022	0.000823374
scaffold133_138338	0.000835126
scaffold781_123001	0.000844676
scaffold220_204722	0.000858613
scaffold556_27073	0.000864984
scaffold22_1031270	0.000867548
scaffold299_324080	0.000875009
scaffold935_124548	0.000875274
scaffold171_70046	0.000875889
scaffold585_203289	0.000878382
scaffold145_275724	0.000882074
scaffold567_207159	0.00088482
scaffold588_4918	0.000886754
scaffold42_586746	0.00088996
scaffold20_619456	0.000892996
scaffold508_201164	0.000907945
scaffold130_193698	0.000913779
scaffold490_123080	0.000915326
scaffold2695_8286	0.000928553
scaffold500_219435	0.000948696
scaffold273_224193	0.000951586
scaffold143_258129	0.000958808
scaffold781_102712	0.00095929
scaffold61_246331	0.000965721
scaffold4957_3411	0.000982469
scaffold1486_20114	0.000995294
scaffold1577_43131	0.000996849
scaffold504_179577	0.0010038
scaffold148_220819	0.00100419
scaffold2984_1604	0.00102232
scaffold132_391583	0.00102717
scaffold81_243634	0.00103429
scaffold119_564608	0.00104436
scaffold793_138892	0.0010465
scaffold413_164624	0.00106843
scaffold628_74541	0.00107106
scaffold465_108002	0.00108704
scaffold165_345538	0.00109554
scaffold12_973730	0.00110091
scaffold18_902847	0.00110457
scaffold1003_157564	0.00110929
scaffold1726_5487	0.00111622
scaffold309_165288	0.0011257
scaffold1675_65909	0.00114591
scaffold4338_820	0.00114874
scaffold1005_161149	0.00114905
scaffold453_236247	0.00117139
scaffold635_208843	0.00117276
scaffold1232_114124	0.00118021
scaffold64_707429	0.00118378
scaffold2811_12702	0.00119626
scaffold231_222756	0.00119872
scaffold61_231357	0.00120495
scaffold254_269781	0.00120803
scaffold763_154493	0.00120962
scaffold694_202101	0.00121936
scaffold520_290541	0.00122215
scaffold360_91496	0.00122674
scaffold284_31683	0.00123693
scaffold800_201447	0.00124534
scaffold1733_75663	0.00126522
scaffold1182_23662	0.00126752
scaffold2318_5657	0.00126799
scaffold1243_53489	0.00128362
scaffold464_246452	0.00129454
scaffold407_77903	0.00131257
scaffold1737_6495	0.00132727
scaffold945_62571	0.00132824
scaffold563_259274	0.00135433
scaffold541_219410	0.00135744
scaffold1402_29407	0.00135886
scaffold1395_88561	0.00135897
scaffold2471_20895	0.0013664
scaffold568_229414	0.00138507
scaffold535_29468	0.00139157
scaffold1557_36503	0.00139779
scaffold4_418333	0.0014007
scaffold2_746651	0.00141928
scaffold555_79942	0.00142034
scaffold1592_20657	0.0014336
scaffold685_164204	0.00143598
scaffold1497_1063	0.00144616
scaffold94_277624	0.00144885
scaffold1974_26900	0.00145489
scaffold2604_12071	0.00145597
scaffold578_100210	0.00146574
scaffold756_189047	0.00146596
scaffold1065_80794	0.00147016
scaffold1133_151436	0.00147307
scaffold653_180282	0.00148249
scaffold173_21821	0.00149555
scaffold142_45519	0.00149872
scaffold390_88311	0.001509
scaffold21_655999	0.00151134
scaffold878_44541	0.00151908
scaffold24_295314	0.00152555
scaffold51_180117	0.00152956
scaffold61_257528	0.00154003
scaffold756_188612	0.00154331
scaffold1733_33793	0.00154702
scaffold1983_32866	0.00155363
scaffold136_234653	0.00155368
scaffold201_2065	0.00156135
scaffold351_29467	0.00156736
scaffold24_861814	0.00156808
scaffold98_118673	0.00157212
scaffold293_208897	0.00157391
scaffold117_387496	0.00157393
scaffold1874_70109	0.0015886
scaffold158_168186	0.00159941
scaffold898_798	0.00160697
scaffold1105_136340	0.00161208
scaffold617_87568	0.00161384
scaffold274_235723	0.00162026
scaffold923_38824	0.00162199
scaffold685_155749	0.001623
scaffold139_56346	0.00162888
scaffold541_221191	0.0016347
scaffold527_25101	0.00163971
scaffold208_387644	0.00164315
scaffold1424_72720	0.00164426
scaffold132_384825	0.00164606
scaffold1289_101684	0.00165853
scaffold345_128996	0.00166056
scaffold810_11366	0.00167965
scaffold115_70055	0.00168038
scaffold206_466203	0.00168074
scaffold168_337321	0.00169782
scaffold217_199910	0.00170399
scaffold169_236439	0.00170487
scaffold79_709720	0.00172091
scaffold943_4698	0.00172272
scaffold349_337798	0.00172557
scaffold553_8049	0.00172912
scaffold76_123823	0.00173011
scaffold493_160587	0.00173456
scaffold2287_25667	0.00173855
scaffold180_187220	0.0017422
scaffold76_604844	0.00174567
scaffold47_10909	0.00175735
scaffold26_162700	0.00175851
scaffold574_109493	0.00176023
scaffold1131_10345	0.00176167
scaffold39_876716	0.00176189
scaffold1613_21504	0.00177135
scaffold459_16559	0.00177183
scaffold9_1086144	0.00177317
scaffold351_365537	0.00177681
scaffold454_57223	0.0017796
scaffold926_46542	0.00178138
scaffold490_157826	0.00178161
scaffold529_273748	0.00178165
scaffold811_160418	0.00178299
scaffold768_141866	0.00178787
scaffold394_290049	0.00179475
scaffold1142_104931	0.00179514
scaffold621_154376	0.00180299
scaffold306_261873	0.00180695
scaffold1266_6279	0.0018156
scaffold19_402321	0.00182365
scaffold3172_7809	0.00182603
scaffold188_448564	0.00182882
scaffold485_167281	0.00183206
scaffold74_465812	0.00183552
scaffold1126_17635	0.00184893
scaffold188_440736	0.00184977
scaffold964_72627	0.00184991
scaffold198_389814	0.00185443
scaffold39_258646	0.00186336
scaffold1033_81004	0.0018746
scaffold2067_53328	0.00188128
scaffold569_135072	0.00188177
scaffold109_303511	0.00188298
scaffold65_225627	0.00189872
scaffold63_49712	0.00189913
scaffold1378_63050	0.00190678
scaffold1752_35508	0.00191014
scaffold801_99541	0.00191543
scaffold615_118276	0.00191992
scaffold1172_71312	0.00192444
scaffold866_74909	0.00192984
scaffold1266_136573	0.00193152
scaffold1213_144287	0.0019464
scaffold7_1389074	0.00195459
scaffold534_17759	0.00195538
scaffold105_264694	0.00196429
scaffold492_173528	0.0019664
scaffold114_428018	0.00196763
scaffold15_658553	0.00198201
scaffold1834_962	0.00198777
scaffold250_59327	0.00199078
scaffold130_250460	0.00200869
scaffold570_52561	0.00200888
scaffold672_148989	0.00201072
scaffold1544_20896	0.00202056
scaffold221_146680	0.00202633
scaffold33_580638	0.00203029
scaffold95_144013	0.00203689
scaffold1434_89932	0.00204376
scaffold696_197630	0.00204547
scaffold614_237934	0.0020476
scaffold61_247386	0.00207676
scaffold7236_415	0.00207688
scaffold221_145836	0.00207985
scaffold208_460434	0.00208501
scaffold104_109351	0.00208616
scaffold5_231516	0.00209758
scaffold1319_12472	0.00211336
scaffold2474_16368	0.00211607
scaffold407_316526	0.00212256
scaffold281_415227	0.00212377
scaffold87_133368	0.00212818
scaffold593_98136	0.00213483
scaffold20_373905	0.00213845
scaffold3476_7664	0.00213896
scaffold322_273202	0.00214305
scaffold578_43438	0.00214309
scaffold18_595060	0.00214407
scaffold2080_27720	0.00215802
scaffold699_28656	0.00216124
scaffold795_120274	0.00217082
scaffold31_715229	0.00218366
scaffold369_117596	0.00218456
scaffold57_73814	0.00218499
scaffold26_814518	0.00219516
scaffold3194_20119	0.00219758
scaffold50_453745	0.00219829
scaffold639_177175	0.00219875
scaffold3974_189	0.00220148
scaffold784_89657	0.00221886
scaffold302_307460	0.00221901
scaffold1129_94876	0.00222086
scaffold1172_92221	0.00224182
scaffold3201_970	0.00224289
scaffold608_75324	0.00224363
scaffold237_303310	0.00224407
scaffold506_245006	0.00224727
scaffold1922_30501	0.0022553
scaffold446_74550	0.00225537
scaffold638_20931	0.0022568
scaffold257_95740	0.00225961
scaffold27_413173	0.00226188
scaffold102_328461	0.00227021
scaffold7_1274522	0.00228396
scaffold373_265455	0.00228494
scaffold961_135110	0.00229205
scaffold143_288348	0.00229323
scaffold823_533	0.00229803
scaffold1618_8182	0.00230328
scaffold1673_54112	0.00230577
scaffold1154_103476	0.00230641
scaffold3037_13234	0.00230683
scaffold16_1230639	0.00232333
scaffold742_10849	0.00234116
scaffold30_1634	0.00234397
scaffold33_848537	0.00235021
scaffold202_281682	0.00235132
scaffold20_71173	0.00237039
scaffold5047_3511	0.00237107
scaffold2569_7080	0.00237355
scaffold2234_39664	0.00238687
scaffold1029_32813	0.00239703
scaffold206_476497	0.00239809
scaffold837_114670	0.00239975
scaffold27_427575	0.00240429
scaffold856_123197	0.00240626
scaffold435_252480	0.00241245
scaffold7_1479431	0.00241339
scaffold1243_52243	0.00242517
scaffold207_290661	0.00242673
scaffold2050_10945	0.00242804
scaffold232_2656	0.00243144
scaffold75_173137	0.00243242
scaffold173_286617	0.00243298
scaffold682_184185	0.00243597
scaffold964_91750	0.00244928
scaffold6_554020	0.00245053
scaffold1018_153645	0.00245486
scaffold794_33007	0.00246051
scaffold259_176313	0.00246549
scaffold108_325904	0.00246946
scaffold819_3112	0.00247964
scaffold1278_33148	0.00248056
scaffold159_533477	0.00248351
scaffold218_465916	0.00248451
scaffold481_67136	0.00248611
scaffold30_863183	0.00248983
scaffold784_88650	0.0024993
scaffold20_437090	0.00250151
scaffold3416_11900	0.00250771
scaffold14_59506	0.00251576
scaffold14_802215	0.00251751
scaffold598_29994	0.00252568
scaffold926_72194	0.00253394
scaffold121_172699	0.00253992
scaffold2327_21189	0.00256331
scaffold5_968597	0.00256343
scaffold1540_9877	0.00256794
scaffold89_282085	0.00256991
scaffold550_15732	0.00257459
scaffold277_278346	0.00257504
scaffold997_24688	0.00259461
scaffold66_719288	0.00259886
scaffold328_153175	0.00260333
scaffold2111_38125	0.00260589
scaffold3333_3320	0.00260651
scaffold409_74184	0.00261272
scaffold152_509287	0.00263796
scaffold52_169936	0.00264236
scaffold269_298250	0.00264351
scaffold1663_74772	0.00264399
scaffold607_17361	0.002645
scaffold1921_48553	0.00264531
scaffold311_304445	0.00264857
scaffold250_59339	0.00266491
scaffold593_96357	0.00266781
scaffold1088_107232	0.00267885
scaffold591_142770	0.00268882
scaffold97_157813	0.00269125
scaffold891_111681	0.00269598
scaffold38_157622	0.00270346
scaffold37_667606	0.00271479
scaffold5_949800	0.00271514
scaffold127_270490	0.00271559
scaffold145_542005	0.00272204
scaffold2075_6610	0.00272791
scaffold262_112633	0.00272994
scaffold49_195633	0.00273325
scaffold23_743570	0.00273511
scaffold1338_121444	0.00273541
scaffold104_110512	0.00273586
scaffold1146_38228	0.00273707
scaffold420_201985	0.00274062
scaffold63_577727	0.00274077
scaffold949_183525	0.00274108
scaffold61_257552	0.00275097
scaffold164_255348	0.0027571
scaffold238_268938	0.00276047
scaffold208_286806	0.00277313
scaffold10_886165	0.00279792
scaffold308_165557	0.00281605
scaffold22_1038254	0.00282612
scaffold1603_15506	0.00283164
scaffold655_198961	0.00283199
scaffold422_218374	0.00283355
scaffold1944_1216	0.00283625
scaffold1032_141713	0.00287807
scaffold141_443458	0.00288128
scaffold4171_8225	0.00288412
scaffold14_228493	0.00288487
scaffold961_135165	0.0029015
scaffold2914_4909	0.00290247
scaffold825_171261	0.00291749
scaffold20_393955	0.00292154
scaffold1472_82952	0.00292382
scaffold18_56059	0.0029289
scaffold825_171332	0.00292947
scaffold165_344410	0.00293199
scaffold1992_8761	0.00293592
scaffold943_51216	0.00293975
scaffold2884_13895	0.00294256
scaffold130_399990	0.0029433
scaffold1675_18667	0.0029466
scaffold746_6645	0.00294845
scaffold311_300492	0.00295474
scaffold812_122044	0.00295972
scaffold76_572822	0.00297668
scaffold2463_8947	0.00298023
scaffold261_205789	0.00298608
scaffold619_27883	0.00302182
scaffold247_334032	0.00303014
scaffold228_67086	0.00303817
scaffold856_115115	0.00305226
scaffold96_257554	0.0030548
scaffold704_185889	0.00305791
scaffold412_183671	0.00306302
scaffold29_73084	0.00307039
scaffold253_63457	0.00307511
scaffold937_158737	0.00308224
scaffold459_194381	0.00308314
scaffold1029_113176	0.00308603
scaffold643_226985	0.0030868
scaffold2002_57389	0.00310884
scaffold41_345701	0.00312017
scaffold1243_24058	0.00312226
scaffold2125_40606	0.00312656
scaffold16_941874	0.00313143
scaffold1534_41282	0.00313471
scaffold61_251506	0.00313887
scaffold311_297984	0.0031391
scaffold211_323157	0.00314141
scaffold2530_7243	0.00314614
scaffold424_318940	0.00315404
scaffold225_58510	0.00317255
scaffold600_113748	0.00317503
scaffold2349_7352	0.00318502
scaffold878_77406	0.00319038
scaffold21_1049157	0.00319373
scaffold953_147735	0.0031938
scaffold227_18909	0.00319727
scaffold217_254330	0.00320041
scaffold350_246011	0.0032072
scaffold1182_47402	0.00320866
scaffold973_24029	0.00321414
scaffold221_309492	0.00322003
scaffold808_118610	0.00322108
scaffold556_205306	0.00322836
scaffold75_93175	0.00323304
scaffold213_260747	0.00323824
scaffold8_520474	0.00326084
scaffold698_174473	0.0032622
scaffold443_200234	0.00326336
scaffold283_86246	0.00326407
scaffold458_5643	0.00326733
scaffold2480_12249	0.00327208
scaffold744_18510	0.00327289
scaffold173_329533	0.00327308
scaffold302_307541	0.00327796
scaffold964_95489	0.00327912
scaffold394_219826	0.00328074
scaffold311_283564	0.00328362
scaffold177_214558	0.00329876
scaffold399_213895	0.00330394
scaffold21_308187	0.00331302
scaffold92_330018	0.00331458
scaffold290_57631	0.0033157
scaffold1044_23324	0.00331927
scaffold94_529414	0.00331941
scaffold100_378910	0.00331944
scaffold13_329125	0.00332163
scaffold2573_4527	0.00332386
scaffold499_210859	0.00333291
scaffold2132_44447	0.00334326
scaffold5927_1442	0.00335006
scaffold13_1175573	0.00335267
scaffold588_4879	0.00337117
scaffold132_55600	0.00337686
scaffold604_4471	0.00339134
scaffold750_142665	0.00339146
scaffold114_570553	0.00339457
scaffold370_53866	0.00339905
scaffold15_508016	0.00339997
scaffold444_219746	0.00340079
scaffold1911_7205	0.00341769
scaffold91_526088	0.00342021
scaffold4_77272	0.00342887
scaffold171_169282	0.00343005
scaffold527_147150	0.00344758
scaffold860_94350	0.00344905
scaffold1689_595	0.00346035
scaffold855_48320	0.00348021
scaffold327_278806	0.00348134
scaffold978_97187	0.00350187
scaffold630_134634	0.0035049
scaffold43_211771	0.00350812
scaffold1947_48823	0.00351278
scaffold1087_156844	0.00351996
scaffold61_270970	0.00352137
scaffold579_169731	0.00352433
scaffold484_72876	0.00352589
scaffold47_313425	0.00352665
scaffold1243_15992	0.00353025
scaffold484_261477	0.00353451
scaffold2155_38865	0.00356441
scaffold327_219932	0.0035697
scaffold1243_27028	0.00357011
scaffold1166_102971	0.00357101
scaffold257_29762	0.00358198
scaffold382_257597	0.00359274
scaffold669_220843	0.00359763
scaffold515_302444	0.0036056
scaffold1165_41426	0.00361137
scaffold3611_9747	0.00361364
scaffold476_103840	0.00362307
scaffold171_70046	0.00363392
scaffold402_199114	0.00363487
scaffold909_97367	0.00364725
scaffold219_51252	0.00364741
scaffold591_236461	0.00364831
scaffold122_573645	0.00365704
scaffold874_15350	0.00366215
scaffold776_63428	0.00366694
scaffold46_757455	0.00368714
scaffold19_569849	0.00368807
scaffold256_121587	0.00368857
scaffold999_117818	0.00369462
scaffold1804_58104	0.00370617
scaffold619_217851	0.00373177
scaffold1342_120462	0.00374206
scaffold65_639830	0.00374935
scaffold164_359590	0.0037537
scaffold1438_65536	0.00375582
scaffold187_149741	0.00375595
scaffold669_139240	0.00376078
scaffold1876_11295	0.00376157
scaffold402_141876	0.00376448
scaffold99_344289	0.0037701
scaffold64_180363	0.00377147
scaffold148_275867	0.00377421
scaffold30_862989	0.00377434
scaffold201_254038	0.00378172
scaffold1215_9701	0.00378461
scaffold30_356007	0.00379054
scaffold82_723095	0.00379374
scaffold766_143561	0.00380192
scaffold582_68779	0.00383655
scaffold935_117691	0.0038388
scaffold8_674449	0.00384484
scaffold1983_10467	0.00384636
scaffold716_9652	0.00385005
scaffold1705_78462	0.00385937
scaffold510_101284	0.00386026
scaffold1099_87224	0.00386283
scaffold1463_60530	0.00386417
scaffold629_78691	0.00387258
scaffold48_388856	0.00387269
scaffold1114_72945	0.00387272
scaffold41_530211	0.00388303
scaffold234_388349	0.00388666
scaffold815_191176	0.00389885
scaffold348_222561	0.00390904
scaffold776_15595	0.00391607
scaffold628_46077	0.00391643
scaffold1376_61934	0.00392389
scaffold263_233276	0.00393293
scaffold1376_68090	0.00393373
scaffold146_215288	0.00393575
scaffold1243_28199	0.003946
scaffold110_372546	0.00395732
scaffold227_273267	0.00395993
scaffold162_262180	0.00396063
scaffold1865_42416	0.0039648
scaffold27_426528	0.00397321
scaffold938_53553	0.00397611
scaffold624_72926	0.00397706
scaffold1497_50453	0.00398136
scaffold139_63272	0.00398403
scaffold274_2860	0.00398944
scaffold213_263908	0.00399416
scaffold633_11744	0.00400146
scaffold906_164036	0.00400443
scaffold762_220472	0.00400498
scaffold533_280008	0.00401951
scaffold35_841036	0.00401966
scaffold2396_33725	0.00402127
scaffold119_18367	0.00402279
scaffold481_155369	0.00402357
scaffold61_238684	0.00402907
scaffold1000_127073	0.0040327
scaffold32_238352	0.00403308
scaffold3813_2902	0.00403428
scaffold936_96439	0.00403918
scaffold14_329719	0.00403918
scaffold1037_27524	0.0040398
scaffold312_386333	0.00405888
scaffold23_356746	0.00405909
scaffold731_111840	0.00406436
scaffold1422_78744	0.00408224
scaffold7_1467162	0.00408953
scaffold41_189148	0.00409895
scaffold274_201992	0.00410114
scaffold295_37723	0.00410807
scaffold1033_137402	0.00411094
scaffold911_59793	0.00411319
scaffold2490_5640	0.0041169
scaffold634_154955	0.00412433
scaffold2524_35721	0.00413262
scaffold2600_32280	0.00413929
scaffold716_135409	0.00415435
scaffold1384_20552	0.00415672
scaffold89_577497	0.00415787
scaffold2593_3018	0.00415801
scaffold535_69688	0.00416083
scaffold186_450328	0.00416126
scaffold53_226759	0.00417644
scaffold1793_35224	0.00417872
scaffold2271_31659	0.00419255
scaffold26_771245	0.00420078
scaffold25_892878	0.00420717
scaffold46_337457	0.00421558
scaffold5_472459	0.00421879
scaffold1037_123185	0.00422406
scaffold1831_78424	0.00422539
scaffold520_178380	0.00422725
scaffold997_97328	0.00422754
scaffold274_195217	0.00424843
scaffold76_45110	0.00425279
scaffold85_341142	0.00425673
scaffold994_117662	0.00426547
scaffold999_100566	0.00426714
scaffold91_483211	0.00427994
scaffold171_436452	0.00428244
scaffold61_230963	0.00428697
scaffold759_145192	0.00428925
scaffold2356_19039	0.00430627
scaffold136_85371	0.00433144
scaffold18_324270	0.00434517
scaffold944_63015	0.00434624
scaffold1795_52360	0.00434755
scaffold34_221614	0.0043595
scaffold207_381774	0.00437751
scaffold213_183714	0.00437758
scaffold41_168683	0.00438095
scaffold176_313018	0.00439128
scaffold468_62113	0.00440045
scaffold124_341021	0.00440132
scaffold345_110953	0.00440359
scaffold59_10346	0.00440747
scaffold60_777012	0.00441779
scaffold35_727729	0.00442072
scaffold932_121803	0.004445
scaffold66_554274	0.00445435
scaffold4053_6457	0.00446792
scaffold123_397026	0.00447223
scaffold3647_6322	0.00447436
scaffold1070_30220	0.00449333
scaffold967_70878	0.0045018
scaffold43_613856	0.0045051
scaffold153_304665	0.00450712
scaffold16_968903	0.00451134
scaffold135_486053	0.00451763
scaffold41_415503	0.00452007
scaffold523_192298	0.00452016
scaffold313_251619	0.00453185
scaffold1085_107635	0.00453514
scaffold1172_58855	0.00453542
scaffold220_185298	0.00454033
scaffold844_17610	0.0045533
scaffold137_224014	0.00455696
scaffold777_169046	0.00455983
scaffold542_264627	0.00456187
scaffold49_123247	0.00456969
scaffold99_187826	0.00457454
scaffold412_173531	0.00457837
scaffold42_94615	0.00457978
scaffold669_187588	0.00458484
scaffold1121_22571	0.0045849
scaffold3039_5815	0.00458683
scaffold68_45901	0.00459201
scaffold504_77564	0.00459265
scaffold4086_7951	0.00459781
scaffold1259_44896	0.00460484
scaffold499_197741	0.00460554
scaffold1167_70955	0.00460688
scaffold530_92937	0.00461469
scaffold10_167184	0.00462331
scaffold372_32681	0.00465055
scaffold1796_30252	0.00467061
scaffold188_84380	0.00467556
scaffold294_91580	0.00467689
scaffold340_338057	0.0046816
scaffold224_210324	0.00469022
scaffold376_284278	0.00469282
scaffold1109_145334	0.00469688
scaffold281_386329	0.00469922
scaffold31_635951	0.00469939
scaffold4516_3288	0.00469983
scaffold418_186555	0.00470367
scaffold1920_6643	0.00470664
scaffold436_79416	0.00471169
scaffold1085_116361	0.00474389
scaffold242_380189	0.00474521
scaffold1070_28976	0.00474919
scaffold695_139948	0.00475035
scaffold191_134050	0.00475111
scaffold1335_84404	0.00475222
scaffold3564_2213	0.00475666
scaffold30_355882	0.0047577
scaffold784_45266	0.00476462
scaffold1588_24069	0.00476914
scaffold256_180269	0.00477282
scaffold224_239755	0.00477376
scaffold1475_91627	0.00477449
scaffold1190_71294	0.00477613
scaffold506_298949	0.00478722
scaffold1626_11616	0.00478797
scaffold49_290017	0.0047922
scaffold957_144355	0.00479758
scaffold4_1065552	0.00480183
scaffold22_847991	0.00480724
scaffold107_365354	0.00482834
scaffold206_176660	0.00483283
scaffold496_221345	0.00483603
scaffold739_104770	0.00484415
scaffold57_661755	0.00484541
scaffold215_263369	0.00485504
scaffold1044_33916	0.00486143
scaffold938_13521	0.00486148
scaffold1414_88033	0.00486318
scaffold243_439532	0.00487786
scaffold18_1041605	0.00488111
scaffold621_218759	0.00488336
scaffold1725_11743	0.0048972
scaffold240_244245	0.00489792
scaffold36_682715	0.00491686
scaffold1356_15477	0.00493205
scaffold504_163513	0.00493664
scaffold675_211214	0.00494234
scaffold143_250456	0.00494298
scaffold3_1465399	0.00494457
scaffold1150_20946	0.00495023
scaffold321_362611	0.00495165
scaffold2909_369	0.00496255
scaffold33_813083	0.00496303
scaffold2262_40837	0.00496785
scaffold1976_33553	0.00497561
scaffold628_45908	0.0049815
scaffold527_82141	0.0049832
scaffold334_147571	0.00499026
scaffold599_154494	0.00499654
scaffold2275_25854	0.00500021
scaffold2178_35516	0.00500556
scaffold2163_10932	0.0050139
scaffold542_128360	0.00502847
scaffold120_222906	0.00503052
scaffold223_223938	0.00503233
scaffold1144_106589	0.00503899
scaffold86_212868	0.00504102
scaffold129_293873	0.0050611
scaffold428_280209	0.00506205
scaffold677_65864	0.00506395
scaffold34_440252	0.0050709
scaffold7_1367692	0.00507435
scaffold137_230286	0.00507676
scaffold188_132538	0.00508238
scaffold168_471955	0.00508693
scaffold39_770317	0.00508999
scaffold402_75442	0.00509067
scaffold44_461169	0.00509184
scaffold165_450560	0.00509754
scaffold207_262525	0.0051002
scaffold1537_101956	0.00510777
scaffold2881_2257	0.00510793
scaffold952_126485	0.00511037
scaffold33_598328	0.00511072
scaffold145_132912	0.00511428
scaffold134_217598	0.00512137
scaffold178_243845	0.00512367
scaffold1221_43523	0.00512371
scaffold264_427674	0.00512934
scaffold899_2330	0.00513789
scaffold360_303606	0.00514058
scaffold825_85974	0.00515042
scaffold2604_32806	0.00515571
scaffold1303_107373	0.00516143
scaffold953_160025	0.00516433
scaffold48_194463	0.00516473
scaffold68_613686	0.00516573
scaffold897_153739	0.00516899
scaffold48_256640	0.00517726
scaffold2255_940	0.00517828
scaffold557_244996	0.00518323
scaffold196_326641	0.00518464
scaffold2029_38827	0.00519358
scaffold86_651541	0.0052088
scaffold951_95494	0.00520901
scaffold132_53436	0.00521887
scaffold1162_137496	0.00521924
scaffold672_92357	0.00522395
scaffold871_46799	0.00522666
scaffold461_48940	0.00523564
scaffold217_43471	0.00523566
scaffold2793_26700	0.00524237
scaffold482_132488	0.00525081
scaffold2166_24890	0.00525417
scaffold459_64765	0.00525487
scaffold741_64738	0.00525785
scaffold2111_43674	0.00525879
scaffold2140_42847	0.00526089
scaffold234_429136	0.00526625
scaffold42_689858	0.005267
scaffold38_611318	0.00526987
scaffold4080_1277	0.00527314
scaffold54_240079	0.00527893
scaffold1917_1680	0.00528298
scaffold506_280969	0.00528831
scaffold1945_15075	0.00528867
scaffold537_245382	0.00529098
scaffold18_555874	0.00529186
scaffold91_613292	0.0052932
scaffold456_49383	0.00530388
scaffold12_320769	0.00530426
scaffold1025_102449	0.0053061
scaffold972_100104	0.00531092
scaffold1945_18174	0.00531791
scaffold539_183634	0.00532472
scaffold14_93244	0.00532613
scaffold172_59094	0.00532721
scaffold302_329540	0.00533218
scaffold399_214891	0.00534174
scaffold503_58899	0.00535851
scaffold591_97373	0.00535969
scaffold284_301692	0.00536292
scaffold135_483282	0.00538224
scaffold4789_3270	0.00538743
scaffold1243_24191	0.00539348
scaffold30_1003360	0.00540643
scaffold626_96809	0.00541045
scaffold202_231880	0.00542453
scaffold133_541512	0.0054247
scaffold162_496723	0.00542612
scaffold713_46241	0.00543155
scaffold2449_12142	0.00543381
scaffold2400_36089	0.005436
scaffold385_356031	0.00544617
scaffold3_1581480	0.00544848
scaffold166_299386	0.00545333
scaffold1740_37439	0.00546325
scaffold288_104299	0.00548414
scaffold1184_62645	0.00548494
scaffold377_171384	0.005516
scaffold77_416498	0.00552022
scaffold2351_39879	0.00553079
scaffold91_107594	0.00553297
scaffold304_198715	0.00553378
scaffold14_1068515	0.00554654
scaffold187_151056	0.0055506
scaffold1192_119793	0.0055507
scaffold1079_2297	0.00555225
scaffold840_161673	0.00556498
scaffold299_122836	0.00556757
scaffold2692_7537	0.0055704
scaffold854_85868	0.00557177
scaffold137_233486	0.00557733
scaffold1912_63698	0.00557937
scaffold402_195171	0.00557952
scaffold2027_63877	0.00558076
scaffold488_257707	0.00558689
scaffold310_52827	0.0055955
scaffold59_495140	0.0055986
scaffold51_588173	0.0055991
scaffold206_372741	0.00560491
scaffold13_494766	0.00561001
scaffold768_18044	0.00561442
scaffold123_164483	0.00562179
scaffold114_153045	0.00562254
scaffold866_155594	0.00563455
scaffold794_67743	0.00563951
scaffold20_106942	0.00564051
scaffold421_282884	0.00564278
scaffold104_355020	0.00564564
scaffold217_140736	0.00564588
scaffold897_122524	0.0056484
scaffold73_372808	0.00565386
scaffold629_104520	0.00566708
scaffold217_254375	0.00567065
scaffold807_212003	0.00567814
scaffold124_4412	0.00569197
scaffold449_185221	0.00569482
scaffold401_189077	0.00569575
scaffold489_141798	0.0056986
scaffold506_145787	0.00570737
scaffold406_179413	0.00571057
scaffold445_176983	0.00571696
scaffold138_461237	0.0057171
scaffold1937_44810	0.00572056
scaffold173_136855	0.00572173
scaffold159_525494	0.00572274
scaffold840_52372	0.005724
scaffold794_86591	0.00572586
scaffold351_53827	0.00572616
scaffold498_128757	0.00573103
scaffold14_330108	0.00574122
scaffold716_90985	0.00575082
scaffold1114_79049	0.00575373
scaffold2282_13270	0.00576361
scaffold1911_43711	0.00576457
scaffold736_96247	0.00577283
scaffold396_256802	0.00577448
scaffold222_172521	0.00577947
scaffold433_295372	0.00578316
scaffold488_23394	0.00578885
scaffold481_71105	0.00578978
scaffold272_365223	0.00580994
scaffold19_130227	0.00581308
scaffold4_170476	0.00581425
scaffold97_54011	0.00582096
scaffold771_92529	0.00582716
scaffold1122_84085	0.00583756
scaffold29_889075	0.00585092
scaffold879_19386	0.00585594
scaffold5483_505	0.00586824
scaffold1243_25904	0.00587486
scaffold1182_54953	0.00588338
scaffold1490_63632	0.00588356
scaffold1113_129827	0.00589937
scaffold141_215134	0.00590324
scaffold4_100155	0.00590959
scaffold542_112281	0.00591054
scaffold417_18725	0.00591509
scaffold998_107914	0.00591524
scaffold8_273290	0.00591756
scaffold1195_115591	0.00593327
scaffold330_243512	0.0059336
scaffold333_220776	0.00594895
scaffold520_179393	0.0059496
scaffold253_341567	0.00595716
scaffold23_371515	0.00595907
scaffold7_850020	0.00596142
scaffold1860_7145	0.00596227
scaffold123_153508	0.00596474
scaffold1816_71992	0.00597948
scaffold770_132282	0.0059832
scaffold3428_3693	0.00598324
scaffold257_117169	0.00599323
scaffold788_133490	0.00600109
scaffold866_12864	0.00600523
scaffold2012_38583	0.00600805
scaffold2328_18492	0.00601556
scaffold42_385974	0.00601628
scaffold121_162972	0.00604173
scaffold790_146486	0.00604431
scaffold49_569487	0.00605459
scaffold171_285914	0.00605973
scaffold1513_22589	0.00606653
scaffold603_202906	0.00608674
scaffold60_795425	0.00610952
scaffold431_249304	0.00611917
scaffold7_1300953	0.00612725
scaffold988_31191	0.00613153
scaffold112_552995	0.00613729
scaffold1099_94258	0.00613893
scaffold2140_42020	0.00614507
scaffold4405_6752	0.00614889
scaffold904_85926	0.00616506
scaffold2155_31261	0.00616578
scaffold98_520421	0.00617178
scaffold1463_72275	0.00617649
scaffold807_163034	0.00618998
scaffold181_141339	0.00619102
scaffold343_103673	0.00619867
scaffold1243_27651	0.00620035
scaffold523_284590	0.00621242
scaffold640_218391	0.00621266
scaffold413_119210	0.00622245
scaffold525_105796	0.00622275
scaffold83_397698	0.0062239
scaffold328_219197	0.00623023
scaffold863_131241	0.0062416
scaffold73_304095	0.00624426
scaffold132_237456	0.0062507
scaffold16_220560	0.00625617
scaffold107_282733	0.00626115
scaffold2639_27118	0.00626133
scaffold65_360220	0.00627097
scaffold205_12458	0.0062734
scaffold1417_58952	0.00628207
scaffold373_97941	0.00628444
scaffold10_174333	0.00628504
scaffold242_389757	0.0062861
scaffold132_349284	0.00629663
scaffold1354_94980	0.00630411
scaffold241_195441	0.00631065
scaffold134_291891	0.00631281
scaffold973_51631	0.00631361
scaffold1180_88033	0.00631607
scaffold586_247801	0.00632354
scaffold392_184543	0.0063246
scaffold2303_18713	0.00632648
scaffold30_658790	0.00632652
scaffold1024_101129	0.00633669
scaffold239_377534	0.00634071
scaffold754_23618	0.0063491
scaffold181_101294	0.00635243
scaffold3027_18093	0.00636145
scaffold2264_39713	0.00636941
scaffold239_206378	0.00637979
scaffold36_185020	0.00638513
scaffold158_112584	0.00638861
scaffold42_286413	0.00638932
scaffold1291_28748	0.00639333
scaffold276_157757	0.00639701
scaffold150_283553	0.00640688
scaffold1847_48989	0.00640726
scaffold572_129788	0.00641699
scaffold3141_2190	0.00642188
scaffold341_31038	0.00643274
scaffold3436_2625	0.00643731
scaffold239_360662	0.00643919
scaffold67_157690	0.00645261
scaffold94_115326	0.00645469
scaffold926_102356	0.00645937
scaffold838_178251	0.00646116
scaffold1852_43436	0.00648289
scaffold949_82278	0.00648841
scaffold1204_74742	0.00649852
scaffold945_82876	0.00649928
scaffold1378_94802	0.00650255
scaffold315_101555	0.00650263
scaffold297_200341	0.00650586
scaffold28_689645	0.00650832
scaffold137_554	0.00652719
scaffold381_297145	0.0065272
scaffold626_98317	0.00653723
scaffold3037_12590	0.00653971
scaffold237_320778	0.00654058
scaffold1331_71954	0.00654408
scaffold153_373696	0.00654584
scaffold1077_46609	0.00655165
scaffold243_129455	0.0065525
scaffold222_128934	0.00655352
scaffold2803_8777	0.0065563
scaffold5_495518	0.00656311
scaffold258_147962	0.0065662
scaffold4308_6382	0.00656836
scaffold511_86865	0.00657019
scaffold2519_32331	0.00658203
scaffold96_195753	0.00659202
scaffold436_273490	0.00659256
scaffold1150_152564	0.00659319
scaffold632_191110	0.0065946
scaffold863_47059	0.00660509
scaffold789_31376	0.00661056
scaffold1289_84114	0.00661263
scaffold361_335334	0.00661551
scaffold188_14866	0.00662114
scaffold89_660466	0.00662333
scaffold129_375123	0.00663485
scaffold535_173848	0.00665015
scaffold981_80055	0.00667575
scaffold2152_5427	0.00668323
scaffold442_169636	0.00668721
scaffold506_200141	0.00669365
scaffold355_180486	0.0066945
scaffold218_86581	0.00670004
scaffold575_158889	0.00670504
scaffold657_235480	0.00672155
scaffold75_405820	0.00672155
scaffold2881_15161	0.00672155
scaffold2825_729	0.00672155
scaffold1460_59916	0.00673399
scaffold186_267406	0.0067396
scaffold149_254584	0.00675992
scaffold392_76081	0.00677011
scaffold18_329813	0.00679882
scaffold15_817166	0.00681295
scaffold27_412477	0.00681766
scaffold56_777820	0.00682174
scaffold1322_93200	0.00682543
scaffold1626_10356	0.00683011
scaffold130_293844	0.00684307
scaffold30_856579	0.00684798
scaffold18_364745	0.00685583
scaffold473_28555	0.00687647
scaffold1_1822050	0.00687789
scaffold12_430782	0.00688165
scaffold397_346733	0.00688241
scaffold1075_58930	0.00688479
scaffold171_193863	0.00689123
scaffold628_193400	0.00690362
scaffold1675_901	0.00690544
scaffold30_861245	0.00690874
scaffold1150_85030	0.00690911
scaffold109_322496	0.00691001
scaffold275_23956	0.00691056
scaffold763_145945	0.00691276
scaffold3401_8146	0.00691326
scaffold10_1020026	0.00692813
scaffold1843_44227	0.00693823
scaffold50_363473	0.006939
scaffold1180_95467	0.00694557
scaffold119_367608	0.00696257
scaffold72_272879	0.00697085
scaffold1602_28326	0.00697547
scaffold140_126366	0.00697611
scaffold923_16103	0.00697674
scaffold25_632547	0.00697721
scaffold311_292736	0.00698296
scaffold1146_35584	0.00698349
scaffold199_213366	0.00699178
scaffold923_7475	0.00699541
scaffold2097_53355	0.00700302
scaffold3462_13221	0.00700304
scaffold2943_9730	0.00700316
scaffold229_236790	0.00700387
scaffold736_87707	0.00700977
scaffold417_316729	0.00701212
scaffold607_3266	0.00702491
scaffold19_924129	0.00702619
scaffold198_41498	0.00703809
scaffold234_238253	0.00703828
scaffold997_146493	0.00703939
scaffold119_429640	0.00704084
scaffold2220_32265	0.00704897
scaffold2230_96	0.00707351
scaffold969_4887	0.00707401
scaffold1093_60167	0.0070809
scaffold1081_29633	0.0070832
scaffold307_162675	0.00708337
scaffold618_2036	0.00708618
scaffold592_130020	0.00708677
scaffold1550_8784	0.00708699
scaffold1086_134439	0.00708714
scaffold686_79297	0.00709645
scaffold853_79311	0.00709865
scaffold21_813603	0.00710759
scaffold2371_26945	0.00712028
scaffold353_83112	0.00712739
scaffold205_318177	0.00712781
scaffold210_291442	0.0071381
scaffold308_36510	0.00713896
scaffold311_294056	0.0071399
scaffold1654_28705	0.00714206
scaffold65_333458	0.00714266
scaffold2108_7608	0.0071466
scaffold486_224201	0.00715396
scaffold62_607821	0.00716307
scaffold1953_58662	0.00717211
scaffold230_378204	0.00717647
scaffold367_76757	0.00718027
scaffold290_209079	0.00719575
scaffold239_237571	0.00719592
scaffold1383_104548	0.00720857
scaffold189_6254	0.00721208
scaffold4001_8474	0.00721519
scaffold1175_140149	0.00721544
scaffold78_150706	0.00722034
scaffold407_78446	0.00722168
scaffold546_177818	0.00723304
scaffold177_75302	0.00723665
scaffold120_223396	0.00724658
scaffold3039_19259	0.00725096
scaffold15_965219	0.00725898
scaffold780_205518	0.00725901
scaffold58_528184	0.00726168
scaffold367_81596	0.00727084
scaffold1243_21640	0.00727311
scaffold1352_110666	0.00727556
scaffold630_166513	0.00728542
scaffold19_494719	0.0072871
scaffold487_183580	0.0073015
scaffold9_30302	0.00730463
scaffold138_261575	0.00731114
scaffold337_184303	0.00731407
scaffold263_407220	0.0073175
scaffold196_465544	0.00732518
scaffold1677_48254	0.0073408
scaffold307_301670	0.00735039
scaffold1782_16793	0.00736414
scaffold194_166876	0.00737173
scaffold654_124265	0.00738535
scaffold147_527251	0.0073985
scaffold533_279718	0.00740441
scaffold98_232271	0.0074048
scaffold679_118349	0.00741587
scaffold40_409896	0.0074245
scaffold16_236725	0.00742739
scaffold412_92852	0.00743458
scaffold224_337957	0.00745502
scaffold199_366330	0.0074646
scaffold812_135875	0.0074674
scaffold1623_17507	0.00746789
scaffold589_147304	0.00746833
scaffold823_79144	0.00747156
scaffold1934_8689	0.00748696
scaffold607_86461	0.00749403
scaffold340_10576	0.00749712
scaffold896_79594	0.00750722
scaffold31_309761	0.00750788
scaffold322_147661	0.00750873
scaffold608_8207	0.00750878
scaffold19_697175	0.00751229
scaffold8_1451209	0.00751382
scaffold119_386312	0.0075155
scaffold983_112908	0.00752472
scaffold399_190923	0.00752561
scaffold2_523463	0.00753505
scaffold766_20011	0.00753681
scaffold35_316627	0.00753786
scaffold135_538157	0.00753907
scaffold234_403540	0.00754091
scaffold1540_29464	0.00754151
scaffold4335_5694	0.00754888
scaffold1858_36219	0.00756784
scaffold593_112650	0.00757289
scaffold505_85009	0.00757502
scaffold1335_83597	0.00758078
scaffold21_305453	0.00758541
scaffold1279_120224	0.00758692
scaffold781_117700	0.00758743
scaffold9_1394228	0.0075879
scaffold1069_124326	0.00759929
scaffold219_323421	0.00759974
scaffold500_177998	0.00760125
scaffold1054_13679	0.00760788
scaffold279_153334	0.00761916
scaffold881_133528	0.00762322
scaffold239_190795	0.00762764
scaffold87_436811	0.00763031
scaffold278_28921	0.00763158
scaffold598_42474	0.00764126
scaffold17_170772	0.00764623
scaffold1004_15909	0.00765342
scaffold283_70512	0.00765632
scaffold345_132295	0.00765692
scaffold1092_22489	0.00765823
scaffold135_22304	0.00765918
scaffold323_502	0.00766533
scaffold34_133241	0.00767018
scaffold16_539998	0.00767531
scaffold441_96016	0.00767987
scaffold388_351531	0.00768156
scaffold89_20333	0.00768576
scaffold12_305371	0.00768579
scaffold143_94712	0.00768992
scaffold21_1022462	0.00769532
scaffold169_396490	0.00769549
scaffold3882_6547	0.00769634
scaffold1248_61207	0.00769698
scaffold470_213176	0.00769949
scaffold1962_30373	0.00770357
scaffold607_59569	0.00770949
scaffold294_222662	0.0077116
scaffold703_92985	0.00771287
scaffold940_59464	0.00771308
scaffold58_98109	0.00773226
scaffold879_181936	0.00773689
scaffold364_38979	0.00774827
scaffold1588_18525	0.00775108
scaffold1589_94172	0.00775436
scaffold484_185615	0.00776451
scaffold687_195513	0.00776889
scaffold18_359670	0.00777986
scaffold144_527613	0.00778006
scaffold1131_90079	0.00778413
scaffold1153_49533	0.007787
scaffold372_34879	0.00779562
scaffold17_412462	0.00779608
scaffold2847_25365	0.00779832
scaffold110_331997	0.00781003
scaffold427_133431	0.0078241
scaffold1318_67847	0.00782549
scaffold3623_2633	0.00782606
scaffold626_125044	0.00782791
scaffold457_41300	0.00783403
scaffold59_229104	0.00783502
scaffold308_49590	0.00783599
scaffold143_207539	0.00784307
scaffold2329_40386	0.00784379
scaffold502_5606	0.00784532
scaffold572_136258	0.00784533
scaffold900_101354	0.00784772
scaffold3121_11875	0.0078587
scaffold228_115783	0.00786527
scaffold579_6124	0.00786788
scaffold600_197404	0.00786886
scaffold7_1090817	0.00786905
scaffold1697_83115	0.00787062
scaffold424_270556	0.00787347
scaffold1499_11876	0.00787488
scaffold214_285259	0.00787675
scaffold1150_36044	0.00788018
scaffold177_43321	0.00788475
scaffold1470_102511	0.00788683
scaffold312_125371	0.00788771
scaffold51_442036	0.00788939
scaffold1719_69255	0.00788944
scaffold22_353614	0.00789159
scaffold342_241687	0.00789974
scaffold118_408385	0.00790256
scaffold19_738794	0.0079044
scaffold75_132544	0.00790812
scaffold1663_48090	0.00791053
scaffold3068_4111	0.00792121
scaffold59_361940	0.00793307
scaffold892_47895	0.00793791
scaffold355_203550	0.00793942
scaffold1671_23443	0.00794452
scaffold169_269773	0.00794568
scaffold2123_37701	0.00795535
scaffold417_19100	0.00795836
scaffold48_323661	0.00796139
scaffold49_313843	0.00796435
scaffold109_315036	0.00796483
scaffold2_1806886	0.00796585
scaffold2887_2458	0.00796887
scaffold728_104185	0.00797015
scaffold15_1065708	0.00797088
scaffold1115_28071	0.00797168
scaffold694_10541	0.00797327
scaffold1137_34493	0.00797537
scaffold5_1604673	0.00797879
scaffold42_618419	0.00798666
scaffold228_192782	0.00799659
scaffold549_42041	0.00799955
scaffold12_1325081	0.00801882
scaffold70_717966	0.00802106
scaffold395_160901	0.00802247
scaffold898_3569	0.008034
scaffold801_95985	0.00803892
scaffold805_99378	0.00804036
scaffold169_105508	0.00804506
scaffold70_696948	0.00804958
scaffold26_699097	0.00805157
scaffold146_420881	0.00809064
scaffold460_152754	0.00810284
scaffold228_124616	0.00810343
scaffold1840_7579	0.00810375
scaffold684_6086	0.00811984
scaffold136_34113	0.00812149
scaffold969_39706	0.00812308
scaffold104_380670	0.00812385
scaffold99_158517	0.00812759
scaffold18_266595	0.00813358
scaffold679_85894	0.00814501
scaffold621_164531	0.00815402
scaffold409_283867	0.00816718
scaffold6_372285	0.0081689
scaffold555_251297	0.00817375
scaffold720_170585	0.00817414
scaffold84_92898	0.0081837
scaffold523_191934	0.00819479
scaffold48_590038	0.00820335
scaffold90_105813	0.00820496
scaffold8_458773	0.00820677
scaffold569_163110	0.00820826
scaffold3041_2811	0.00820938
scaffold2674_24808	0.0082118
scaffold3023_1940	0.00821542
scaffold443_217547	0.00822048
scaffold555_68785	0.00822168
scaffold761_213458	0.00823159
scaffold119_355227	0.00823736
scaffold237_294483	0.00823883
scaffold133_55227	0.00824477
scaffold75_109009	0.00824501
scaffold1299_86433	0.00824505
scaffold1179_68440	0.00824647
scaffold409_308727	0.00825599
scaffold3419_14728	0.00825632
scaffold589_230224	0.00826458
scaffold355_204413	0.00826519
scaffold221_331189	0.00826889
scaffold99_649691	0.00828025
scaffold597_136096	0.00828844
scaffold75_175268	0.00828879
scaffold111_179097	0.00831557
scaffold741_149930	0.00831944
scaffold396_23483	0.0083303
scaffold15_1282440	0.00833439
scaffold2685_2478	0.00834857
scaffold301_396916	0.00835191
scaffold1538_46559	0.00836198
scaffold38_712157	0.00836435
scaffold747_100409	0.00836514
scaffold208_446365	0.00836917
scaffold351_346882	0.00837029
scaffold287_244670	0.00837456
scaffold496_61827	0.00838226
scaffold2_523463	0.00838345
scaffold273_10748	0.00838787
scaffold754_217923	0.00840246
scaffold267_314639	0.00840438
scaffold1243_21667	0.00840798
scaffold53_699579	0.00841326
scaffold49_450192	0.00841471
scaffold618_181706	0.00841475
scaffold4666_1499	0.00842377
scaffold443_143848	0.0084274
scaffold1597_37583	0.00844043
scaffold181_241403	0.00844138
scaffold171_72606	0.0084456
scaffold856_129196	0.00844654
scaffold36_554922	0.00845198
scaffold6_93783	0.00845485
scaffold1763_12830	0.00845738
scaffold4_1242164	0.00846011
scaffold554_242069	0.00847128
scaffold87_555818	0.00847211
scaffold340_267864	0.00847385
scaffold559_32157	0.00848311
scaffold1334_52749	0.00848348
scaffold68_2627	0.00848521
scaffold91_451789	0.00848633
scaffold487_249472	0.00849483
scaffold146_431426	0.00849497
scaffold953_58128	0.00850529
scaffold275_96882	0.00850567
scaffold479_316331	0.00851077
scaffold742_15498	0.00852614
scaffold1110_35749	0.00852898
scaffold11_962021	0.00853567
scaffold245_167865	0.0085436
scaffold1834_66511	0.00854436
scaffold1209_32743	0.00854644
scaffold24_293890	0.00854671
scaffold12_311341	0.00854865
scaffold253_55634	0.00855697
scaffold42_626154	0.00856579
scaffold72_55072	0.00858991
scaffold189_142351	0.00859088
scaffold505_159107	0.00859347
scaffold132_309163	0.00859422
scaffold2583_22457	0.0085951
scaffold37_785329	0.00860209
scaffold3799_8525	0.00860468
scaffold730_142549	0.00860844
scaffold604_107438	0.0086163
scaffold239_334328	0.00863198
scaffold24_982911	0.00863294
scaffold19_422978	0.00864054
scaffold437_192280	0.00864397
scaffold48_16743	0.00864594
scaffold2811_25515	0.00864945
scaffold1288_34633	0.0086666
scaffold533_279517	0.00866812
scaffold133_310320	0.00867245
scaffold50_301417	0.00867412
scaffold230_458443	0.00867559
scaffold3986_5605	0.00869352
scaffold653_238312	0.00869369
scaffold2822_11206	0.00869714
scaffold520_299178	0.00871185
scaffold132_459468	0.00871264
scaffold901_142426	0.00871317
scaffold406_141360	0.00873981
scaffold72_504916	0.008745
scaffold500_151163	0.00874941
scaffold55_266178	0.00875182
scaffold117_365443	0.00876282
scaffold379_207153	0.00877289
scaffold5_596649	0.00877552
scaffold2416_24641	0.00877662
scaffold379_147598	0.00877742
scaffold2632_9316	0.00879833
scaffold218_88046	0.00880056
scaffold459_294179	0.00880422
scaffold358_313295	0.00880936
scaffold7_1286115	0.00882467
scaffold641_59600	0.00882512
scaffold294_351717	0.00882864
scaffold1230_88482	0.00883946
scaffold239_333512	0.00884123
scaffold1012_80308	0.00884632
scaffold1466_69516	0.00886415
scaffold309_141848	0.00887199
scaffold377_219692	0.00887356
scaffold403_156299	0.0088755
scaffold494_275380	0.00887681
scaffold570_207035	0.00887802
scaffold134_244232	0.00891201
scaffold287_74553	0.00891601
scaffold2621_20479	0.00891714
scaffold312_239708	0.00892102
scaffold374_277583	0.00894182
scaffold194_104655	0.00894531
scaffold19_526543	0.00894815
scaffold33_559556	0.00894835
scaffold3900_3218	0.00895113
scaffold111_393060	0.00895648
scaffold281_90559	0.00896618
scaffold97_204811	0.00897263
scaffold24_161476	0.00897777
scaffold50_175707	0.00898678
scaffold480_140480	0.00900488
scaffold327_117756	0.00901271
scaffold22_706108	0.00902482
scaffold213_267398	0.00902542
scaffold4_1318708	0.00903777
scaffold992_80777	0.00903993
scaffold554_34560	0.00904577
scaffold618_18473	0.0090468
scaffold34_289191	0.0090476
scaffold368_175087	0.00906121
scaffold205_302903	0.00906482
scaffold2220_17583	0.00906644
scaffold1170_24907	0.00907151
scaffold539_5226	0.00907529
scaffold929_6906	0.0090766
scaffold99_231444	0.00908061
scaffold1673_486	0.00908184
scaffold392_129888	0.00909654
scaffold743_49699	0.00910703
scaffold80_46374	0.00911973
scaffold6061_548	0.00912209
scaffold2044_57083	0.00912587
scaffold94_20892	0.00913599
scaffold89_381054	0.00914495
scaffold454_57279	0.00915527
scaffold89_258857	0.00916101
scaffold886_170914	0.00916349
scaffold13_464102	0.00916472
scaffold506_29568	0.00916561
scaffold1406_75518	0.00916963
scaffold30_300402	0.00917534
scaffold1466_105208	0.00917824
scaffold1759_75004	0.00920276
scaffold311_293210	0.00921174
scaffold15_501614	0.00921489
scaffold209_423841	0.00921794
scaffold647_218659	0.00921838
scaffold1277_14111	0.0092221
scaffold1049_145487	0.00922959
scaffold182_261719	0.0092351
scaffold374_303959	0.00924648
scaffold273_129922	0.00925187
scaffold608_4263	0.00926107
scaffold888_50864	0.00926437
scaffold405_25587	0.00926576
scaffold275_211339	0.00926702
scaffold38_411581	0.00927151
scaffold781_107574	0.00927414
scaffold1204_69721	0.00928293
scaffold98_448507	0.00928313
scaffold261_267141	0.00928331
scaffold722_84662	0.00930295
scaffold7253_324	0.00930855
scaffold33_826313	0.00931162
scaffold2001_18870	0.00931926
scaffold114_483906	0.00932105
scaffold238_201036	0.00932526
scaffold640_209826	0.00933362
scaffold739_174595	0.00933569
scaffold4_1474521	0.0093498
scaffold206_165397	0.00935528
scaffold647_197620	0.0093575
scaffold813_21543	0.00936161
scaffold3363_4219	0.00936778
scaffold276_83221	0.00936858
scaffold2176_46901	0.00937145
scaffold275_214442	0.00938995
scaffold13_953763	0.00939377
scaffold32_868922	0.00940614
scaffold52_387375	0.00940771
scaffold21_724289	0.00940908
scaffold560_151325	0.00941687
scaffold557_196124	0.00941983
scaffold735_202499	0.00942261
scaffold2111_15594	0.00942785
scaffold191_321053	0.0094298
scaffold991_105755	0.00944149
scaffold389_267986	0.00944946
scaffold661_30983	0.00945651
scaffold131_156812	0.00946046
scaffold5_124219	0.0094737
scaffold64_206707	0.00947522
scaffold793_147382	0.00947671
scaffold73_601389	0.00949026
scaffold360_76441	0.00949156
scaffold43_247383	0.00949249
scaffold739_80294	0.00949324
scaffold162_170289	0.00949777
scaffold495_255678	0.00951346
scaffold271_436	0.00951537
scaffold544_249476	0.00951719
scaffold1239_87451	0.00953282
scaffold999_120756	0.00953971
scaffold696_12583	0.0095496
scaffold418_323981	0.00955352
scaffold121_540556	0.00955859
scaffold890_95731	0.00957138
scaffold102_80557	0.00957175
scaffold74_703650	0.00957683
scaffold2538_1377	0.00958353
scaffold1350_77466	0.00958756
scaffold321_135722	0.00958837
scaffold1534_56543	0.00959007
scaffold130_206512	0.00959357
scaffold1145_46983	0.00959717
scaffold779_70140	0.00960499
scaffold2670_7472	0.00960567
scaffold679_67035	0.00961655
scaffold1779_73879	0.00961739
scaffold51_386387	0.00962004
scaffold125_266522	0.00963524
scaffold1773_77122	0.00963633
scaffold780_217699	0.00966191
scaffold325_339424	0.00967567
scaffold16_544283	0.00967853
scaffold650_59831	0.00968044
scaffold130_54508	0.00968073
scaffold1644_57702	0.00968975
scaffold1338_28271	0.00969847
scaffold66_729958	0.00970569
scaffold250_163368	0.00971521
scaffold53_384962	0.0097166
scaffold57_718408	0.00972282
scaffold19_715365	0.00972793
scaffold5665_2055	0.00973078
scaffold770_165482	0.009731
scaffold1093_59920	0.00974864
scaffold206_104305	0.00975031
scaffold907_173772	0.00975467
scaffold29_459137	0.00976458
scaffold27_421573	0.00978262
scaffold94_23606	0.0098009
scaffold566_251228	0.00981313
scaffold784_149739	0.00981353
scaffold468_1155	0.00982061
scaffold349_339884	0.00982174
scaffold70_480483	0.00982945
scaffold180_220206	0.00983174
scaffold149_281842	0.00984557
scaffold233_170159	0.00984675
scaffold432_120683	0.00984815
scaffold450_36717	0.00984938
scaffold238_455851	0.00985684
scaffold1341_75265	0.00985848
scaffold135_468571	0.00985971
scaffold1018_9278	0.00986567
scaffold3084_15929	0.00987877
scaffold181_8316	0.00988025
scaffold35_895920	0.00988063
scaffold270_233039	0.0098849
scaffold138_397659	0.00990042
scaffold298_256855	0.00990175
scaffold652_10076	0.00990284
scaffold2075_33677	0.00991395
scaffold54_465305	0.00991759
scaffold825_98523	0.00992574
scaffold303_212461	0.00994023
scaffold38_796785	0.00994324
scaffold1504_51005	0.00994908
scaffold46_45370	0.00995178
scaffold608_161536	0.00996898
scaffold35_377709	0.00996976
scaffold1579_54239	0.0099785
scaffold294_217602	0.00999507
scaffold407_79561	0.00999802
scaffold652_2177	0.0100009
scaffold23_219169	0.010003
scaffold358_65798	0.0100097
scaffold1588_19362	0.0100161
scaffold56_596346	0.0100205
scaffold307_258593	0.0100253
scaffold12_49791	0.0100282
scaffold2639_4945	0.0100307
scaffold266_53555	0.0100318
scaffold272_234714	0.0100368
scaffold164_190860	0.0100416
scaffold1400_70477	0.0100431
scaffold794_144725	0.0100438
scaffold2463_36347	0.0100523
scaffold1341_115995	0.0100618
scaffold1652_46947	0.0100644
scaffold12_307818	0.0100671
scaffold534_134777	0.0100741
scaffold51_111878	0.0100743
scaffold327_113595	0.0100773
scaffold33_264263	0.0100822
scaffold57_228190	0.0100911
scaffold306_388122	0.010092
scaffold2303_6213	0.0100952
scaffold29_415223	0.0100991
scaffold4083_4668	0.0101022
scaffold508_110418	0.0101033
scaffold152_233969	0.0101037
scaffold1077_13785	0.0101038
scaffold1352_6903	0.0101051
scaffold206_97835	0.010116
scaffold302_370893	0.0101172
scaffold155_113877	0.0101194
scaffold673_93739	0.0101221
scaffold1553_32016	0.0101224
scaffold62_678410	0.0101344
scaffold451_123659	0.0101393
scaffold7_1525890	0.0101399
scaffold139_198486	0.010146
scaffold1758_65380	0.0101495
scaffold114_407305	0.0101501
scaffold896_177087	0.0101505
scaffold272_252883	0.0101516
scaffold782_189120	0.0101629
scaffold2355_4637	0.010166
scaffold129_67853	0.0101668
scaffold359_334349	0.0101831
scaffold12_640212	0.0101884
scaffold9_658309	0.0101884
scaffold186_41096	0.0101888
scaffold16_47785	0.0101938
scaffold1180_1516	0.010195
scaffold1175_116588	0.0101965
scaffold473_69657	0.0101968
scaffold65_348114	0.0101974
scaffold582_39164	0.0101996
scaffold670_120773	0.0102061
scaffold73_499855	0.010208
scaffold201_413768	0.0102102
scaffold41_438080	0.0102399
scaffold186_357317	0.0102471
scaffold9_1239093	0.0102578
scaffold502_4494	0.0102766
scaffold355_300491	0.0102778
scaffold28_581090	0.0102837
scaffold35_697510	0.0102846
scaffold24_378415	0.0102881
scaffold60_92968	0.0102924
scaffold43_269687	0.0102939
scaffold324_292346	0.0103029
scaffold34_430871	0.0103081
scaffold139_533777	0.0103081
scaffold11_908500	0.0103109
scaffold50_447268	0.0103154
scaffold87_452745	0.0103253
scaffold84_350410	0.0103402
scaffold301_245518	0.0103416
scaffold371_357834	0.0103561
scaffold151_384231	0.0103581
scaffold1641_67541	0.0103612
scaffold132_13792	0.0103643
scaffold503_45374	0.0103696
scaffold1559_15573	0.0103802
scaffold652_110532	0.0103968
scaffold159_342632	0.0104028
scaffold1776_52890	0.0104061
scaffold584_130555	0.010414
scaffold805_93580	0.0104189
scaffold29_857855	0.0104195
scaffold2097_55662	0.0104257
scaffold125_93497	0.0104326
scaffold424_269941	0.0104422
scaffold1136_59049	0.0104428
scaffold675_111411	0.0104455
scaffold131_302767	0.0104478
scaffold2653_7342	0.0104537
scaffold765_192587	0.010459
scaffold122_525075	0.0104591
scaffold559_21773	0.0104672
scaffold26_936781	0.010481
scaffold351_31087	0.010487
scaffold481_138333	0.0104938
scaffold739_127437	0.0104959
scaffold53_89464	0.0104979
scaffold269_393704	0.0105025
scaffold306_276424	0.0105047
scaffold1531_31001	0.0105076
scaffold783_117423	0.0105087
scaffold479_221551	0.0105116
scaffold351_214274	0.0105248
scaffold503_60148	0.0105332
scaffold449_223934	0.0105362
scaffold1235_36332	0.010543
scaffold1646_15152	0.0105495
scaffold21_376099	0.0105633
scaffold720_51440	0.0105664
scaffold403_112723	0.0105687
scaffold896_138779	0.010569
scaffold1285_8665	0.0105696
scaffold3133_19463	0.0105699
scaffold406_218260	0.0105708
scaffold541_210736	0.0105711
scaffold158_168186	0.0105769
scaffold143_200272	0.0105793
scaffold720_20667	0.0105812
scaffold1763_58229	0.0105847
scaffold3570_2904	0.0105879
scaffold46_18759	0.0106018
scaffold1199_116659	0.0106237
scaffold10_1077958	0.0106363
scaffold187_497743	0.0106371
scaffold2826_2225	0.0106385
scaffold236_28782	0.0106427
scaffold399_226151	0.0106496
scaffold4720_1586	0.0106503
scaffold543_39293	0.0106577
scaffold2279_46524	0.0106751
scaffold1166_68675	0.0106819
scaffold1750_68243	0.0106947
scaffold451_125036	0.0106976
scaffold135_143558	0.0107003
scaffold2314_16534	0.0107078
scaffold40_801717	0.0107098
scaffold76_238347	0.0107145
scaffold35_389965	0.0107147
scaffold932_135547	0.0107244
scaffold130_35399	0.0107361
scaffold483_209490	0.0107379
scaffold191_413557	0.0107443
scaffold1037_140099	0.0107449
scaffold10_772464	0.0107482
scaffold54_737924	0.010753
scaffold12_183864	0.0107534
scaffold542_259731	0.0107546
scaffold2567_23639	0.0107591
scaffold120_257771	0.0107605
scaffold1726_19737	0.0107655
scaffold209_247714	0.0107786
scaffold112_455257	0.0107919
scaffold263_379176	0.0107966
scaffold149_83870	0.0108277
scaffold3492_3528	0.010829
scaffold209_315361	0.0108364
scaffold599_155780	0.0108417
scaffold682_27135	0.0108473
scaffold29_337199	0.0108516
scaffold3796_10695	0.0108684
scaffold47_752027	0.0108693
scaffold1122_95391	0.0108751
scaffold534_209651	0.0108797
scaffold1106_34594	0.0108817
scaffold26_183382	0.0108909
scaffold132_192210	0.0108911
scaffold130_492548	0.0108913
scaffold23_401237	0.0108925
scaffold1597_37390	0.0108944
scaffold958_118738	0.0108981
scaffold37_816347	0.0109016
scaffold27_430375	0.0109083
scaffold1664_1608	0.0109107
scaffold23_11638	0.0109184
scaffold360_160447	0.0109188
scaffold129_554642	0.0109227
scaffold4768_658	0.0109262
scaffold141_335125	0.0109295
scaffold858_63250	0.01093
scaffold90_389243	0.0109321
scaffold596_249704	0.0109324
scaffold622_87899	0.0109349
scaffold217_200337	0.010942
scaffold801_37445	0.0109439
scaffold34_200762	0.0109509
scaffold1811_2896	0.0109637
scaffold2063_54288	0.0109653
scaffold88_235473	0.0109655
scaffold111_435177	0.010976
scaffold699_27247	0.0109963
scaffold969_15677	0.0110135
scaffold221_141596	0.0110204
scaffold395_301189	0.0110234
scaffold1417_9055	0.0110241
scaffold952_58204	0.0110256
scaffold801_23901	0.0110296
scaffold50_365375	0.0110306
scaffold1005_143724	0.0110321
scaffold526_39023	0.0110381
scaffold34_286571	0.0110392
scaffold888_181496	0.0110414
scaffold904_18492	0.0110426
scaffold2416_20411	0.011046
scaffold190_62436	0.0110561
scaffold181_236468	0.0110571
scaffold53_227042	0.0110608
scaffold771_6023	0.0110687
scaffold1243_16015	0.0110698
scaffold2519_7443	0.0110709
scaffold114_259222	0.0110726
scaffold224_75334	0.0110729
scaffold1931_30295	0.0110789
scaffold520_295217	0.0110796
scaffold874_397	0.0110891
scaffold689_155607	0.011094
scaffold211_301528	0.0110969
scaffold661_155678	0.0110987
scaffold21_320381	0.0110998
scaffold2598_18353	0.0111034
scaffold1182_124514	0.0111067
scaffold1538_17630	0.011121
scaffold293_254643	0.0111235
scaffold7_322810	0.0111372
scaffold99_204462	0.0111395
scaffold3549_10762	0.0111443
scaffold79_698353	0.0111748
scaffold978_164201	0.0111776
scaffold77_448684	0.0111851
scaffold15_1016562	0.0111852
scaffold3513_2362	0.0111881
scaffold116_130160	0.0111893
[truncated: 7,052 more rows]
